# Supplementary material for: A water contact glass@PiG film color converter with superhigh brightness and ultralong durability for wide-area underwater lighting and communication
Source: Royal Society of Chemistry journal article supplement (doi:10.1039/d4tc05223d), 2025-01-01
Supplement: d4tc05223d1.pdf [file d4tc05223d1.pdf]

## Supporting information

### **Water Contact Glass@PiG Film Color Converter with Superhigh Brightness and Ultralong Durability for Wide- area Underwater Lighting and Communication**

Ganyu Cai,<sup>a</sup> Qiangqiang Zhu,<sup>\*a</sup> Guojuan Wang,<sup>a</sup> Zetao Shen,<sup>a</sup> Yue Zhai,<sup>a</sup> Yubin Kang,<sup>a</sup>

Le Wang<sup>\*a</sup>

<sup>a</sup> College of Optics and Electronic Technology, China Jiliang University, Hangzhou  
310018, China

Email: zhuqiangqiang@cjlu.edu.cn; calla@cjlu.edu.cn

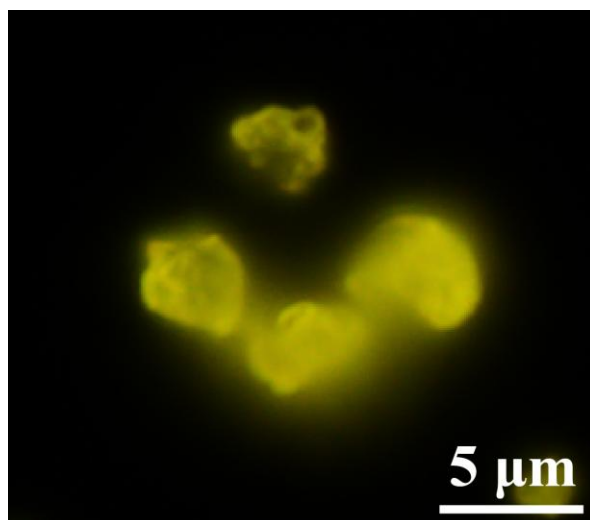

**Figure S1** Fluorescence microscope images of YAG-SiN:Ce phosphor.

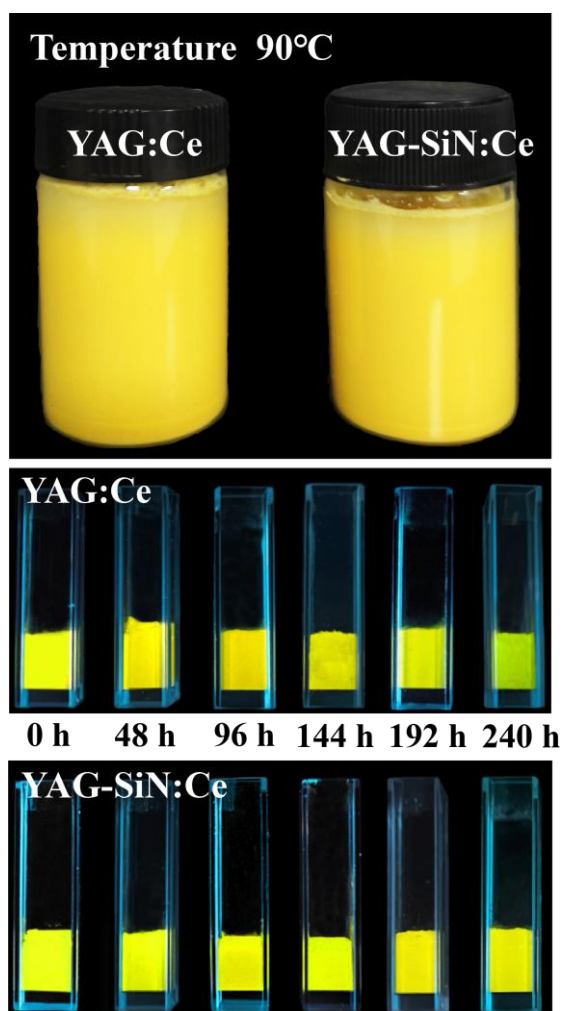

**Figure S2** The color change of YAG:Ce and YAG-SiN:Ce phosphors after submerged in hot water for varying durations.

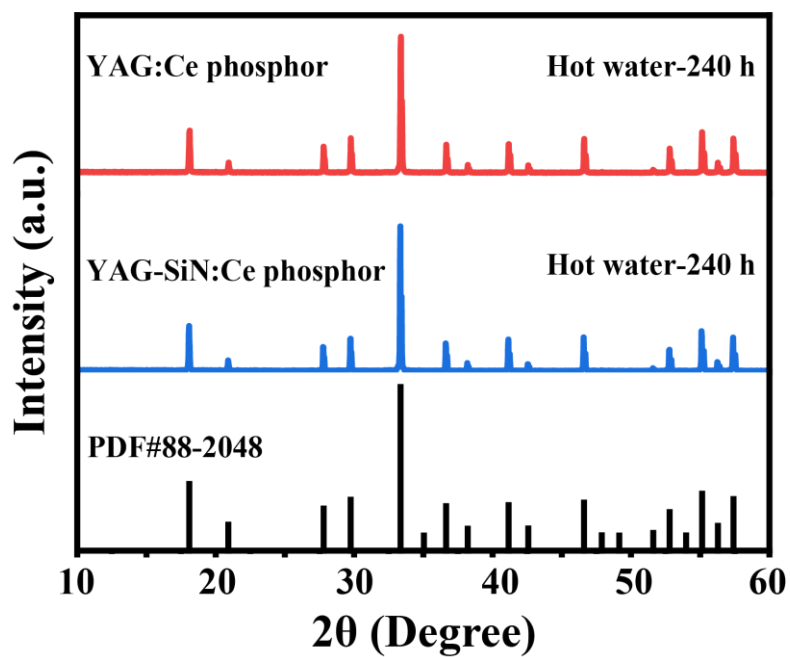

**Figure S3** XRD patterns of YAG:Ce and YAG-SiN:Ce phosphors after hot water treatment.

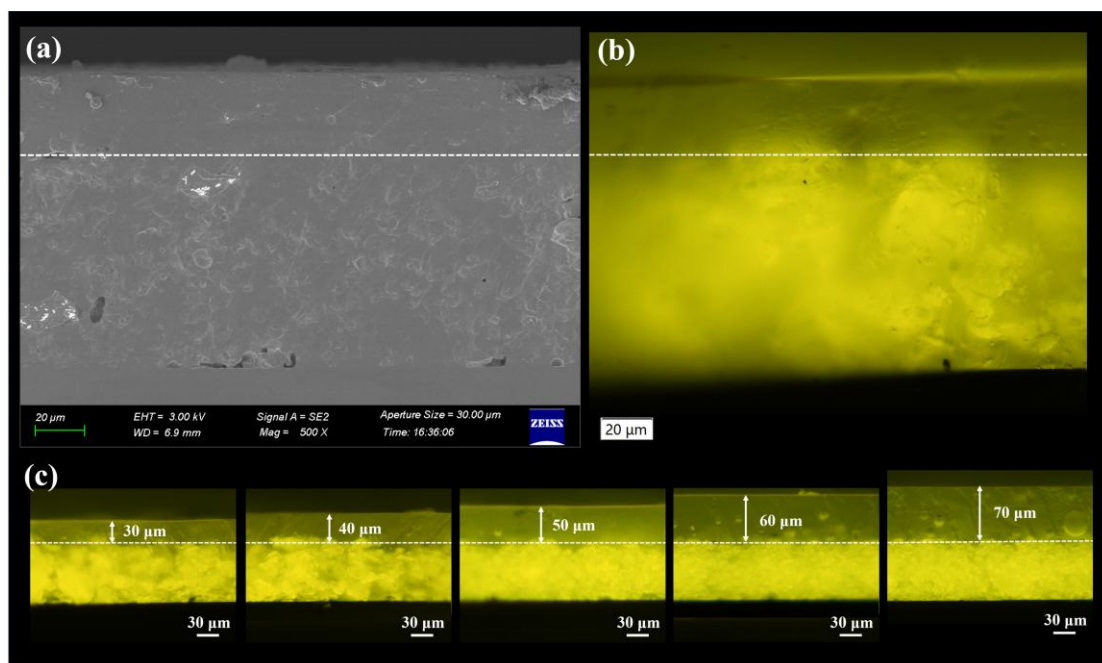

**Figure S4** (a) SEM and (b) fluorescence microscope images of Glass@YAG-SiN:Ce PiG film with a glass film thickness of 30 μm; (c) Fluorescence microscope images of Glass@YAG-SiN:Ce PiG films with varying glass film thicknesses

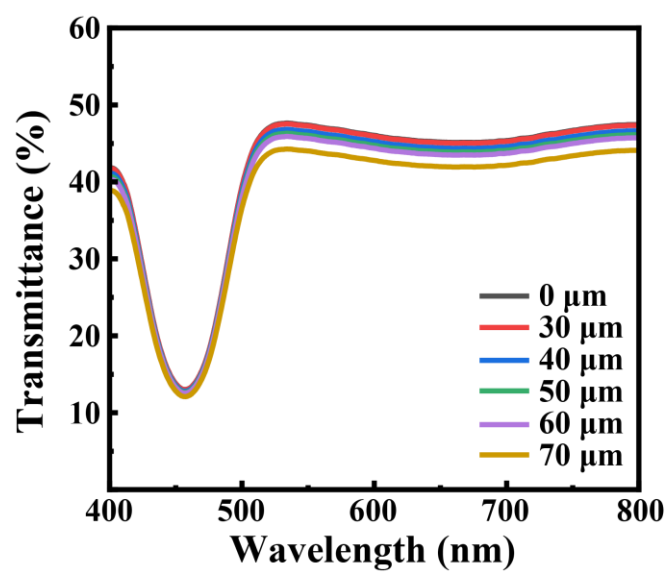

**Figure S5** Total transmittance spectra of Glass@YAG-SiN:Ce PiG films with different glass film thicknesses

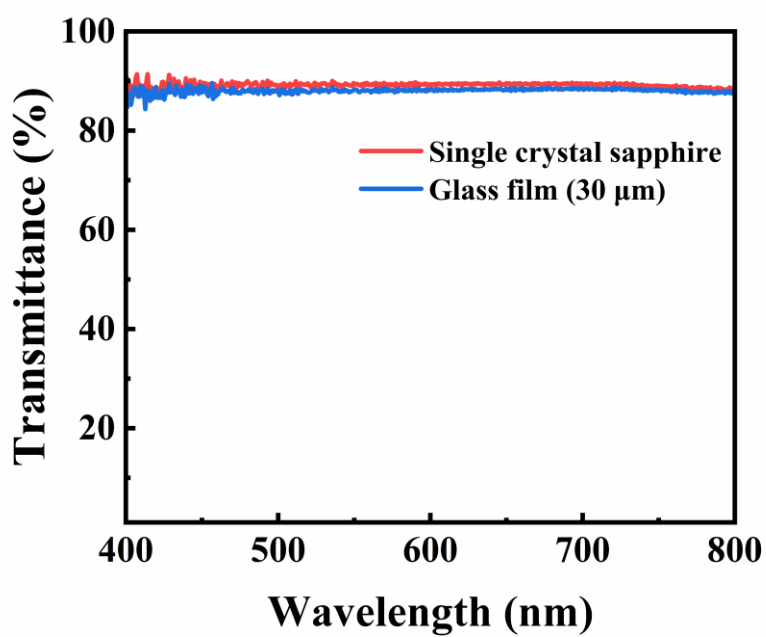

**Figure S6** Total transmittance spectra of single crystal sapphire and glass film.

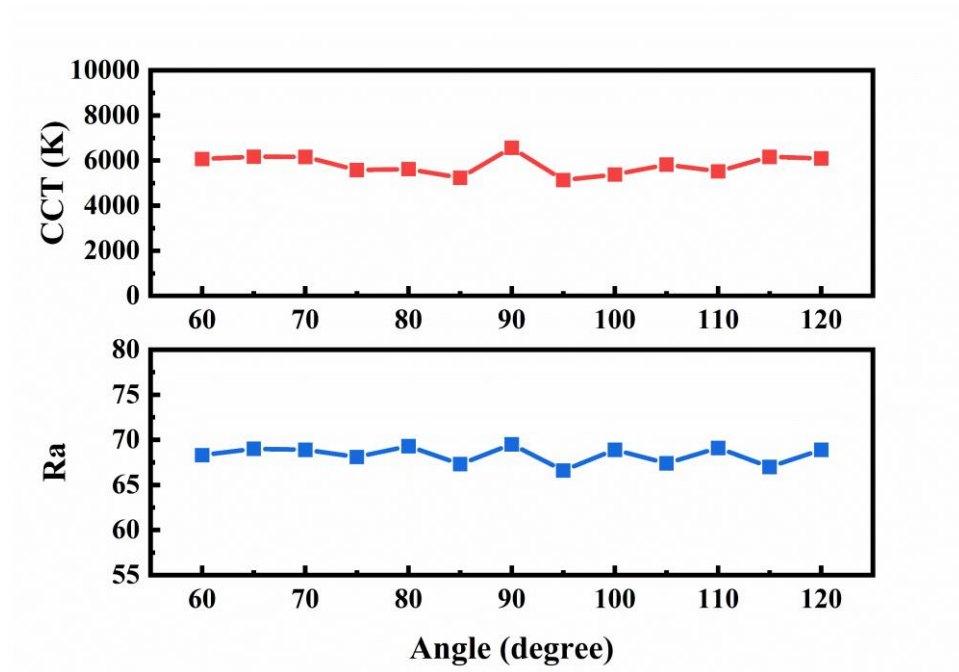

**Figure S7** Ra and CCT values measured at different angles (60 - 120°) of Glass@YAG-SiN:Ce PiG film

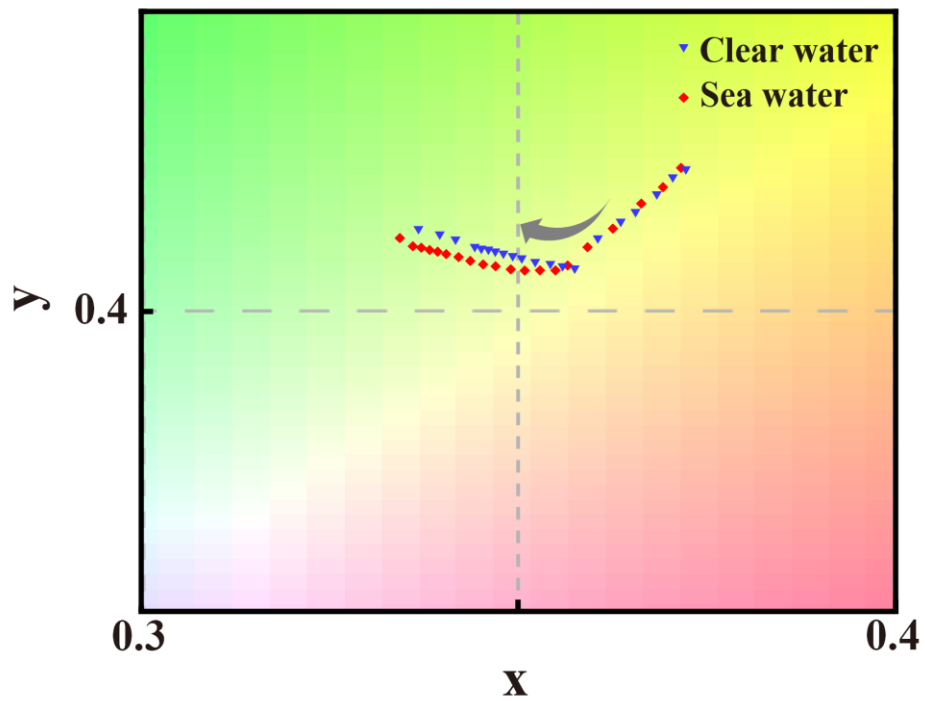

**Figure S8** CIE 1931 color coordinates of light sources at different distances.

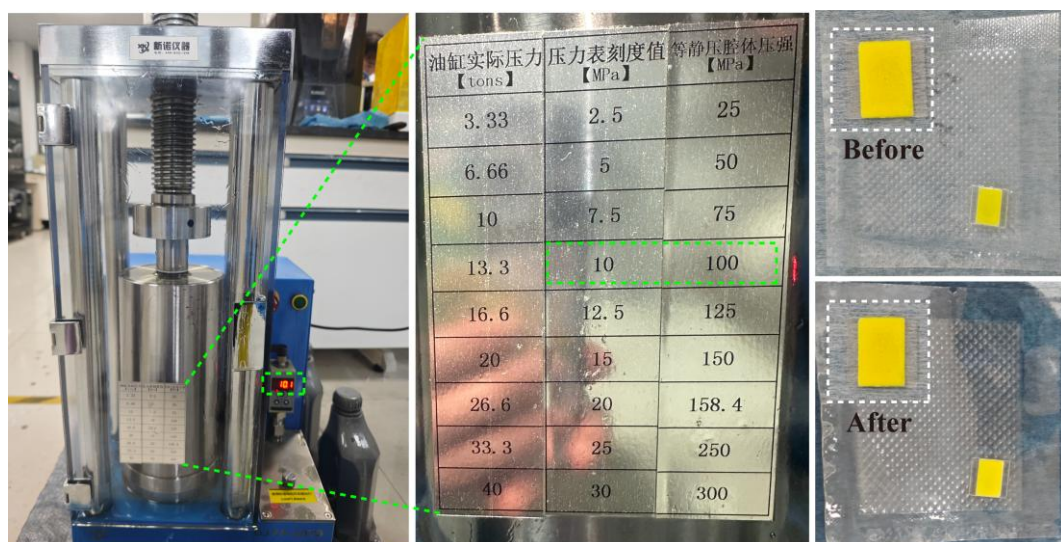

**Figure S9** Glass@PiG film before and after cold isostatic pressure at 100 MPa for 10 minutes.
